# Supplementary material for: Embryonic origin of two ASD subtypes of social symptom severity: the larger the brain cortical organoid size, the more severe the social symptoms
Source: Springer Nature journal article supplement (doi:10.1186/s13229-024-00602-8), 2024-05-25
Supplement: 13229_2024_602_MOESM1_ESM.pdf [file 13229_2024_602_MOESM1_ESM.pdf]

| Table S1: Idiopathic ASD patient-derived iPSC studies |                 |                     |                              |          |                                            |          |                                                                                                     |
|-------------------------------------------------------|-----------------|---------------------|------------------------------|----------|--------------------------------------------|----------|-----------------------------------------------------------------------------------------------------|
| ASD patient                                           | ASD Sample Size | iPSC->?             | Correlation w/ Clinical Data | scRNAseq | Reference                                  | PMID     | Link                                                                                                |
| Idiopathic                                            | 1               | Organoids           | No                           | Yes      | Jourdan et al. Nature Neuroscience 2023    |          | <a href="https://doi.org/10.1038/s41593-023-01399-0">https://doi.org/10.1038/s41593-023-01399-0</a> |
| Idiopathic                                            | 8               | NPC, Neurons        | No                           | No       | Marchetto et al. Molecular Psychiatry 2017 | 27378147 | <a href="https://doi.org/10.1038%2Fmp.2016.95">https://doi.org/10.1038%2Fmp.2016.95</a>             |
| Idiopathic                                            | 8               | Neurons             | No                           | No       | Linker et al. Molecular Autism 2020        | 32591005 | <a href="https://pubmed.ncbi.nlm.nih.gov/32591005/">https://pubmed.ncbi.nlm.nih.gov/32591005/</a>   |
| Idiopathic & Syndromic                                | 5 & 2           | Astrocytes          | No                           | No       | Mansur et al. Int J Mol Sci. 2021          | 34299197 | <a href="https://pubmed.ncbi.nlm.nih.gov/34299197/">https://pubmed.ncbi.nlm.nih.gov/34299197/</a>   |
| Idiopathic                                            | 8               | NPCs, Neurons       | No                           | No       | Li et al. Genes 2021                       | 34946850 | <a href="https://pubmed.ncbi.nlm.nih.gov/34946850/">https://pubmed.ncbi.nlm.nih.gov/34946850/</a>   |
| Idiopathic                                            | 8               | NPCs, Neurons       | No                           | No       | Ding et al. Am J Transl Res. 2021          | 34540009 | <a href="https://pubmed.ncbi.nlm.nih.gov/34540009/">https://pubmed.ncbi.nlm.nih.gov/34540009/</a>   |
| Idiopathic & Syndromic                                | 4 & 3           | NPC                 | No                           | No       | Gomes et al. Front Neurosci. 2022          | 35360153 | <a href="https://pubmed.ncbi.nlm.nih.gov/35360153/">https://pubmed.ncbi.nlm.nih.gov/35360153/</a>   |
| Idiopathic & Syndromic                                | 3 & 2           | NPC                 | No                           | No       | Connacher et al. Stem Cell Reports. 2022   | 35623351 | <a href="https://pubmed.ncbi.nlm.nih.gov/35623351/">https://pubmed.ncbi.nlm.nih.gov/35623351/</a>   |
| Idiopathic                                            | 1               | Neurons             | No                           | No       | Song et al. Mol Brain. 2019                | 31699123 | <a href="https://pubmed.ncbi.nlm.nih.gov/31699123/">https://pubmed.ncbi.nlm.nih.gov/31699123/</a>   |
| Idiopathic                                            | 2               | iPSC                | No                           | No       | Guo et al. Stem Cell Res. 2021             | 34438162 | <a href="https://pubmed.ncbi.nlm.nih.gov/34438162/">https://pubmed.ncbi.nlm.nih.gov/34438162/</a>   |
| Idiopathic                                            | 3               | Neurons, Astrocytes | No                           | No       | Russo et al. Biol Psychiatry. 2018         | 29129319 | <a href="https://pubmed.ncbi.nlm.nih.gov/29129319/">https://pubmed.ncbi.nlm.nih.gov/29129319/</a>   |
| Idiopathic                                            | 3               | Neurons             | No                           | No       | Grunwald et al. Transl Psychiatry. 2019    | 31358727 | <a href="https://pubmed.ncbi.nlm.nih.gov/31358727/">https://pubmed.ncbi.nlm.nih.gov/31358727/</a>   |
| Idiopathic                                            | 3               | NPC                 | No                           | No       | Moore et al. Stem Cells Int. 2019          | 31191687 | <a href="https://pubmed.ncbi.nlm.nih.gov/31191687/">https://pubmed.ncbi.nlm.nih.gov/31191687/</a>   |
| Idiopathic                                            | 3               | Neurons             | No                           | No       | Liu et al. Mol Neurobiol. 2017             | 27356918 | <a href="https://pubmed.ncbi.nlm.nih.gov/27356918/">https://pubmed.ncbi.nlm.nih.gov/27356918/</a>   |
| Idiopathic                                            | 3               | NPC                 | No                           | No       | Wang et al. Cell Stem Cell. 2020           | 32004479 | <a href="https://pubmed.ncbi.nlm.nih.gov/32004479/">https://pubmed.ncbi.nlm.nih.gov/32004479/</a>   |
| Idiopathic                                            | 4               | Organoids           | No                           | No       | Mariani et al. Cell. 2015                  | 26186191 | <a href="https://pubmed.ncbi.nlm.nih.gov/26186191/">https://pubmed.ncbi.nlm.nih.gov/26186191/</a>   |
| Idiopathic                                            | 4               | Organoids           | No                           | No       | Ilieva et al. Mol Psychiatry. 2022         | 35618886 | <a href="https://pubmed.ncbi.nlm.nih.gov/35618886/">https://pubmed.ncbi.nlm.nih.gov/35618886/</a>   |
| Idiopathic                                            | 4               | Organoids           | No                           | No       | Ejlersen et al. J Neural Transm. 2022      | 35266053 | <a href="https://pubmed.ncbi.nlm.nih.gov/35266053/">https://pubmed.ncbi.nlm.nih.gov/35266053/</a>   |
| Idiopathic                                            | 5               | iPSC                | No                           | No       | Suzuki et al. Molecular Psychiatry 2015    | 25582616 | <a href="https://pubmed.ncbi.nlm.nih.gov/25582616/">https://pubmed.ncbi.nlm.nih.gov/25582616/</a>   |
| Idiopathic                                            | 6               | NPC                 | No                           | No       | Sanchez-Sanchez et al. Hum Mutat. 2018     | 29969175 | <a href="https://pubmed.ncbi.nlm.nih.gov/29969175/">https://pubmed.ncbi.nlm.nih.gov/29969175/</a>   |
| Idiopathic                                            | 6               | NPC, Neurons        | No                           | No       | DeRosa et al. Sci. Rep. 2018               | 29849033 | <a href="https://pubmed.ncbi.nlm.nih.gov/29849033/">https://pubmed.ncbi.nlm.nih.gov/29849033/</a>   |
| Idiopathic                                            | 6               | NPC, Neurons        | No                           | No       | Griesi-Olivera et al. Mol Psychiatry. 2021 | 32060413 | <a href="https://pubmed.ncbi.nlm.nih.gov/32060413/">https://pubmed.ncbi.nlm.nih.gov/32060413/</a>   |
| Idiopathic                                            | 8               | NPC, Neurons        | No                           | No       | Schafer et al. Nat. Neurosci. 2019         | 30617258 | <a href="https://pubmed.ncbi.nlm.nih.gov/30617258/">https://pubmed.ncbi.nlm.nih.gov/30617258/</a>   |
| Idiopathic                                            | 8               | Neurons             | No                           | No       | Amatya et al. Stem Cell Reports. 2019      | 31474529 | <a href="https://pubmed.ncbi.nlm.nih.gov/31474529/">https://pubmed.ncbi.nlm.nih.gov/31474529/</a>   |
| Idiopathic                                            | 9               | Neurons             | No                           | No       | Adhya et al. Biol Psychiatry. 2021         | 32826066 | <a href="https://pubmed.ncbi.nlm.nih.gov/32826066/">https://pubmed.ncbi.nlm.nih.gov/32826066/</a>   |
| Idiopathic & Syndromic                                | 43 & 22         | iPSCs               | No                           | No       | Brick et al. Stem Cells Transl Med. 2014   | 25273538 | <a href="https://pubmed.ncbi.nlm.nih.gov/25273538/">https://pubmed.ncbi.nlm.nih.gov/25273538/</a>   |
| Idiopathic & ASD traits                               | 2 & 2           | Neurons             | No                           | No       | Lewis et al. Mol Autism. 2019              | 31893020 | <a href="https://pubmed.ncbi.nlm.nih.gov/31893020/">https://pubmed.ncbi.nlm.nih.gov/31893020/</a>   |
