# Supplementary material for: Embryonic origin of two ASD subtypes of social symptom severity: the larger the brain cortical organoid size, the more severe the social symptoms
Source: Springer Nature journal article supplement (doi:10.1186/s13229-024-00602-8), 2024-05-25
Supplement: 13229_2024_602_MOESM2_ESM.pdf [file 13229_2024_602_MOESM2_ESM.pdf]

| Table S2. Syndromic patient-derived iPSC studies |                                                |                                      |                   |                              |          |                                              |          |
|--------------------------------------------------|------------------------------------------------|--------------------------------------|-------------------|------------------------------|----------|----------------------------------------------|----------|
| ASD Sample Size                                  | Source                                         | Genes and CNVs of interest           | iPSC >?           | Correlation w/ Clinical Data | scRNAseq | Reference                                    | PMID     |
| 1 patient/gene                                   | ASD patient-derived                            | 13 genes, 1 CNV                      | Neurons           | No                           | No       | Deneault et al. Elife. 2019                  | 30747104 |
| 3 & 2                                            | 1q21.1 del & dup patient-derived               | 1q21.1 del & dup                     | Neurons           | No                           | No       | Chapman et al. Mol Psychiatry. 2022          | 34112971 |
| 5                                                | 15q11-q13.1 dup                                | 15q11-q13.1 dup                      | Neurons           | No                           | No       | Germain et al. Mol Autism. 2014              | 25694803 |
| 1                                                | 15q13.3 dup patient-derived                    | 15q13.3 dup                          | NPCs, Neurons     | No                           | No       | Meganathan et al. BMC Biol. 2021             | 34320968 |
| 2 & 1                                            | Angelman Syndrome and Prader-Willi Syndrome    | 15q11-q13 del (maternal or paternal) | NPCs, Neurons     | No                           | No       | Chamberlain et al. PNAS. 2010                | 20876107 |
| 1 & 1                                            | 16p11.2 del and dup patient-derived            | 16p11.2 del & dup                    | Organoids         | No                           | No       | Urresti et al. Mol Psychiatry. 2021          | 34548630 |
| 13                                               | 16p11.2 del patient-derived                    | 16p11.2 del                          | NPCs              | No                           | No       | Roth et al. Elife. 2020                      | 33169669 |
| 3 & 3                                            | 16p11.2 del and dup patient-derived            | 16p11.2 del & dup                    | Neurons           | No                           | No       | Deshpande et al. Cell Rep. 2017              | 29212016 |
| 15                                               | 22q11.2 del patient-derived                    | 22q11.2 del                          | Organoids         | No                           | No       | Khan et al. Nat Med. 2020                    | 32989314 |
| 2                                                | Phelan-McDermid Syndrome                       | 22q13.3 del                          | Neurons           | No                           | No       | Shcheglovitov et al. Nature. 2013            | 24132240 |
| 1                                                | RELN & CACNA1H patient-derived                 | CACNA1H, RELN                        | NPCs              | No                           | No       | Teles E Silva et al. Transl Psychiatry. 2022 | 35668055 |
| 2                                                | Timothy Syndrome patient-derived               | Ca(v)1.2                             | Neurons           | No                           | No       | Paça et al. Nat Med. 2011                    | 22120178 |
| 2                                                | Timothy Syndrome patient-derived               | Ca(v)1.2                             | Cardiomyocytes    | No                           | No       | Yazawa et al. Nature. 2011                   | 21307850 |
| 2                                                | Timothy Syndrome patient-derived               | Ca(v)1.2                             | Neurons           | No                           | No       | Krey et al. Nat Neurosci. 2013               | 23313911 |
| 1                                                | Timothy Syndrome patient-derived               | Ca(v)1.2                             | NPCs, Neurons     | No                           | No       | Tian et al. Genome Med. 2014                 | 25360157 |
| 3                                                | Timothy Syndrome patient-derived               | Ca(v)1.2                             | Organoids         | No                           | No       | Birey et al. Nature. 2017                    | 28454655 |
| 3                                                | Timothy Syndrome patient-derived               | Ca(v)1.2                             | Neurons           | No                           | No       | Panagiotakos et al. Elife. 2019              | 31868578 |
| 3                                                | Timothy Syndrome patient-derived               | Ca(v)1.3                             | Organoids         | No                           | No       | Birey et al. Cell Stem Cell. 2022            | 34990580 |
| 2                                                | Rett Syndrome patient-derived                  | CDKL5                                | Neurons           | No                           | No       | Amenduni et al. Eur J Hum Genet. 2011        | 21750574 |
| 2                                                | Rett Syndrome patient-derived                  | CDKL5                                | Neurons           | No                           | No       | Ricciardi et al. Nat Cell Biol. 2012         | 22922712 |
| 2                                                | Rett Syndrome patient-derived                  | CDKL5                                | Neurons           | No                           | No       | Wu et al. Neurobiol Dis. 2022                | 36202289 |
| 3                                                | CNTNAP2 patient-derived                        | CNTNAP2                              | Organoids         | No                           | Yes      | deJong et al. Nat Commun. 2021               | 34471112 |
| 2                                                | Rubenstein-Taybi patient-derived               | CREBBP                               | Neurons           | No                           | No       | Alari et al. Int J Mol Sci. 2021             | 34071322 |
| 5                                                | Rubenstein-Taybi patient-derived               | CREBBP/EP300                         | Neurons           | No                           | No       | Calzari et al. Mol Neurobiol. 2020           | 32562237 |
| 1                                                | Kleefstra patient-derived                      | EHMT1                                | Neurons           | No                           | No       | Nagy et al. Transl Psychiatry. 2017          | 28742076 |
| 3                                                | Kleefstra patient-derived                      | EHMT1                                | Neurons           | No                           | No       | Frega et al. Nat Commun. 2019                | 31666522 |
| 8                                                | Fragile X patient-derived                      | FMR1                                 | NPCs, Neurons     | No                           | No       | Raj et al. Cell Rep. 2021                    | 33852833 |
| 3                                                | Fragile X patient-derived                      | FMR1                                 | NPCs, Neurons     | No                           | No       | Sheridan et al. PLoS One. 2011               | 22022567 |
| 3                                                | Fragile X patient-derived                      | FMR1                                 | iPSCs             | No                           | No       | Urbach et al. Cell Stem Cell. 2010           | 20452313 |
| 3                                                | Fragile X patient-derived                      | FMR1                                 | Neurons           | No                           | No       | Doers et al. Stem Cells Dev. 2014            | 24654675 |
| 3                                                | Fragile X patient-derived                      | FMR1                                 | Neurons           | No                           | No       | Halevy et al. Stem Cell Reports. 2014        | 25483109 |
| 1                                                | Female Fragile X premutation carrier           | FMR1 premutation                     | Neurons           | No                           | No       | Liu et al. Hum Mol Genet. 2012               | 22641815 |
| 3                                                | MBD5 patient-derived                           | MBD5                                 | NPCs              | No                           | No       | Mullegama et al. Sci Rep. 2021               | 34050248 |
| 1                                                | Rett Syndrome patient-derived                  | MECP2                                | Neurons           | No                           | No       | Hotta et al. Nat Methods. 2009               | 19404254 |
| 1                                                | Rett Syndrome patient-derived                  | MECP2                                | NPCs and Neuron   | No                           | No       | Muotri et al. Nature. 2010                   | 21085180 |
| 4                                                | Rett Syndrome patient-derived                  | MECP2                                | Neurons           | No                           | No       | Marchetto et al. Cell. 2010                  | 21074045 |
| 5                                                | Rett Syndrome patient-derived                  | MECP2                                | Neurons           | No                           | No       | Kim et al. Proc Natl Acad Sci USA. 2011      | 21807996 |
| 3                                                | Rett Syndrome patient-derived                  | MECP2                                | Neurons           | No                           | No       | Ananiev et al. PLoS One. 2011                | 21966470 |
| 4                                                | Rett Syndrome patient-derived                  | MECP2                                | Neurons           | No                           | No       | Cheung et al. Hum Mol Genet. 2011            | 21372149 |
| 1                                                | Rett Syndrome patient-derived                  | MECP2                                | Neurons           | No                           | No       | Nott et al. Nat Neurosci. 2016               | 27428650 |
| 3                                                | Rett Syndrome patient-derived                  | MECP2                                | NPCs in 3D hydro  | No                           | No       | Zhang et al. Proc Natl Acad Sci USA. 2016    | 26944080 |
| 1                                                | Rett Syndrome patient-derived                  | MECP2                                | Neurons           | No                           | No       | Tang et al. Proc Natl Acad Sci USA. 2016     | 26733678 |
| 1                                                | Rett Syndrome patient-derived                  | MECP2                                | NPCs              | No                           | No       | Yoo et al. Biochem Biophys Res Commun. 2019  | 29050935 |
| 2                                                | Rett Syndrome patient-derived                  | MECP2                                | Neurons           | No                           | No       | Mellos et al. Mol Psychiatry. 2018           | 28439102 |
| 1                                                | Rett Syndrome patient-derived                  | MECP2                                | NPCs and Neuron   | No                           | No       | Sena de Souza et al. Mol Neurobiol. 2019     | 31214863 |
| 2                                                | Rett Syndrome patient-derived                  | MECP2                                | NPCs, Astrocytes, | No                           | No       | Kim et al. PLoS One. 2019                    | 30789962 |
| 2                                                | Rett Syndrome patient-derived                  | MECP2                                | Organoids         | No                           | No       | Yildirim et al. Elife. 2022                  | 35904330 |
| 3                                                | Rett Syndrome patient-derived                  | MECP2                                | Neurons           | No                           | No       | Perego et al. Int J Mol Sci. 2022            | 36430969 |
| 3                                                | Rett Syndrome patient-derived                  | MECP2                                | Neurons           | No                           | No       | Haase et al. Int J Mol Sci. 2022             | 36232428 |
| 3                                                | MECP2 Duplication Syndrome patients            | MECP2 dup                            | Neurons           | No                           | No       | Nageshappa et al. Mol Psychiatry. 2016       | 26347316 |
| 1 & 1                                            | ASD patient-derived                            | MECP2, TRPC6                         | NPC, Neurons      | No                           | No       | Griesi-Olivera et al. Mol Psychiatry. 2015   | 25385366 |
| 1                                                | Rett Syndrome patient-derived                  | MECP2 E1                             | Neurons           | No                           | No       | Djuric et al. Neurobiol. Dis. 2015           | 25644311 |
| 3                                                | ASD patient-derived                            | NRXN1A                               | Neurons           | No                           | No       | Avazzadeh et al. Mol Autism. 2019            | 31893021 |
| 3                                                | ASD P TCHD1-AS patient-derived                 | P TCHD1-AS                           | Neurons           | No                           | No       | Ross et al. Biol Psychiatry. 2020            | 31540669 |
| 1                                                | ASD RELN patient-derived and Single gene mutat | RELN                                 | Neurons           | No                           | No       | Arioka et al. Transl Psychiatry. 2018        | 30022058 |
| 2                                                | ASD SHANK2 patients                            | SHANK2                               | Neurons           | No                           | No       | Zaslavsky et al. Nat Neurosci. 2019          | 30911184 |
| 1                                                | ASD SHANK2 patient                             | SHANK2                               | Neurons           | No                           | No       | Lutz et al. Front Mol Neurosci. 2021         | 34899182 |
| 3                                                | ASD (SHANK3) patient-derived & Single gene mu  | SHANK3                               | Organoids         | No                           | Yes      | Wang et al. Nat Commun. 2022                 | 36202854 |
| 3                                                | Noonan Syndrome patient-derived                | SHP2                                 | Organoids         | No                           | Yes      | Kim et al. Int J Mol Sci. 2022               | 36430334 |
| 3                                                | Noonan Syndrome patient-derived                | SHP2                                 | Organoids, NPCs   | No                           | No       | Ju et al. Stem Cell Res Ther. 2020           | 32493428 |
| 5                                                | Pitt-Hopkins patient-derived                   | TCF4                                 | Organoids, NPCs,  | No                           | Yes      | Papes et al. Nat Commun. 2022                | 35501322 |
| 1                                                | Tuberous Sclerosis patient-derived             | TSC1                                 | NPCs              | No                           | No       | Martin et al. Mol Autism. 2020               | 31921404 |
| 1                                                | Tuberous Sclerosis patient-derived             | TSC2                                 | NPCs, Neurons, A  | No                           | No       | Li et al. Stem Cell Reports. 2017            | 28344003 |
