# Supplementary material for: Embryonic origin of two ASD subtypes of social symptom severity: the larger the brain cortical organoid size, the more severe the social symptoms
Source: Springer Nature journal article supplement (doi:10.1186/s13229-024-00602-8), 2024-05-25
Supplement: 13229_2024_602_MOESM3_ESM.pdf [file 13229_2024_602_MOESM3_ESM.pdf]

**Supplement Table S4: Sex, ethnicity and race of the 11 ASD and 6 control study subjects.**

| <b>Group</b>   | <b>Sex<br/>M/F</b> | <b>Hispanic<br/>%</b> | <b>Race</b>                                    |
|----------------|--------------------|-----------------------|------------------------------------------------|
| <b>ASD</b>     | <b>9/2</b>         | <b>32%</b>            | <b>8 caucasian,<br/>1 asian,<br/>1 unknown</b> |
| <b>Control</b> | <b>6/0</b>         | <b>0</b>              | <b>6 caucasian</b>                             |
